# Supplementary material for: Evaluation of residual antibacterial potency in antibiotic production wastewater using a real-time quantitative method
Source: Royal Society of Chemistry journal article supplement (doi:10.1039/c5em00228a), 2015-01-01
Supplement: c5em00228a1.pdf [file c5em00228a1.pdf]

**Supplementary Information:**

**Evaluation of residual antibacterial potency in antibiotic production wastewater  
using a real-time quantitative method**

Hong Zhang <sup>a</sup>, Yu Zhang <sup>a, b, \*</sup>, Min Yang <sup>a</sup>, Miaomiao Liu <sup>b</sup>

<sup>a</sup> *Beijing Key Laboratory of Industrial Wastewater Treatment and Reuse, Research Center for Eco-Environmental Sciences, Chinese Academy of Sciences, Beijing, 100085, China.*

<sup>b</sup> *Key Laboratory of Drinking Water Science and Technology, Research Center for Eco-Environmental Sciences, Chinese Academy of Sciences, Beijing, 100085, China.*

\* Corresponding author (E-mail: zhangyu@rcees.ac.cn, Tel: 86-10-62928390, Fax: 86-10-62923541)

**Materials and methods**

**Figure S1**

**Table S1-S9**

**References**

## **Materials and methods**

### **Sample pretreatment**

The solid phase extraction (SPE) procedures for oxytetracycline (OTC) production wastewater were carried out as follows<sup>1</sup>: (1) adjust the pH of wastewater sample (500 mL each) to 2.5–3.0 with 40% H<sub>2</sub>SO<sub>4</sub>, and add 0.2 g of Na<sub>2</sub>EDTA to the sample to complex potential interfering metals; (2) precondition an Oasis HLB cartridge with 5 mL of methanol, 5 mL of 0.5 M HCl and 5 mL of ultra-pure water sequentially; (3) extract the sample with the HLB cartridge at a flow rate of approximately 0.5 mL/min, and wash the cartridge with 5 mL of 5% methanol aqueous solution and 5 mL ultra-pure water; (4) elute the antibiotics with 10 mL of a dichloromethane/acetone mixture (3:2, v/v); (5) dry the extract under a gentle stream of N<sub>2</sub>; (6) dissolve the dried residue with 0.8 mL of methanol and dilute with 1.2 mL of ultra-pure water.

The SPE procedures for spiramycin (SPM) production wastewater were carried out as follows<sup>2</sup>: (1) Oasis HLB cartridges were preconditioned sequentially with 10 mL of methanol, 10 mL of water, 10 mL of 2% NaCl, and 2 mL of 0.1 M phosphate buffer (pH 8.0); (2) extract 500 mL wastewater sample (after filtered) with the HLB cartridge at a flow rate of 0.5 mL/min, and wash the cartridge with 5 mL of ultra-pure water; (3) the cartridge was then dried under a gentle stream of N<sub>2</sub>; (4) antibiotics were eluted from the cartridge with 10 mL of 95% methanol; (5) dry the extract under a gentle stream of N<sub>2</sub>; (6) dissolve the dried residue with 2 mL of solvent buffer (prepared by mixing ACN and 0.1 M ammonium acetate in a ratio of 15:85).

### **UPLC-MS/MS analyses**

Concentrations of OTC and its transformation products (three hydrolysates, 4-epi-oxytetracycline (EOTC),  $\alpha$ -apo-oxytetracycline ( $\alpha$ -apo-OTC),  $\beta$ -apo-oxytetracycline ( $\beta$ -apo-OTC)) and SPM and neospiramycin (NeoSPM) were detected by UPLC-MS/MS (Acquity UPLC system, Waters, USA) equipped with an Acquity UPLC BEH C18 column (2.1 mm $\times$ 100 mm, 1.7  $\mu$ m particles, Waters, USA) according to procedures reported previously<sup>1-5</sup>.

OTCs: Stock solutions of OTCs (1 mg/mL) were prepared in methanol and diluted to the range of 0.05–1 mg/L to obtain the standard curves. Ultrapure water added with 0.1% formic acid was used as solution A, while methanol was used as solution B. Separation conditions are as following: solution A decreased from 90% to 70% in the first 4 min, then decreased from 70% to 10% in 4.5 min, and then maintained at 10% for 1 min, and increased back to 90% in 0.5 min, finally balancing at 90% for 3 min. The flow rate was 0.25 mL/min. The electrospray ionization was operated in the positive ion mode. The capillary was 3.5 kV, source temperature was 110 °C, and desolvation temperature was 600 °C. Nitrogen gas was used as the desolvation gas with a flow rate of 600 L/h and the cone gas of 60 L/h. The operational parameters of the tandem MS were listed in Table S3.

SPMs: Stock solutions of SPM and NeoSPM (1 mg/mL) were prepared in methanol and diluted to the range of 0.05–1 mg/L to obtain the standard curves. Ultrapure water added with 0.1% formic acid was used as solution A, while methanol was used as solution B. Separation conditions are as following: solution A decreased from 90% to

60% in the first 3 min, then maintained at 60% for 3 min, and increased back to 90% in 0.1 min, finally balancing at 90% for 3.9 min. The flow rate was 0.25 mL/min. Electro-sprayed ionization mode (positive) was used for the MS/MS system. Ion source and dissolvent gas temperatures were 120 °C and 600 °C, respectively. Capillary was 3.5 kV. The dissolvent gas flow rate was 600 L/h. The operational parameters of the tandem MS were listed in Table S4.

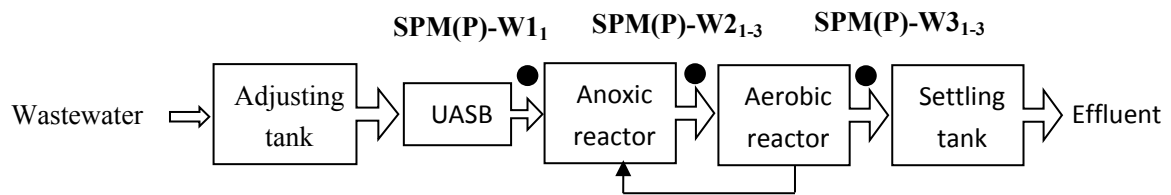

(a) Pilot-scale SPM production wastewater treatment system

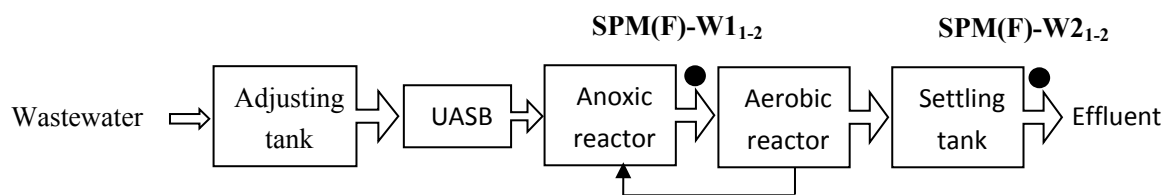

(b) Full-scale SPM production wastewater treatment system

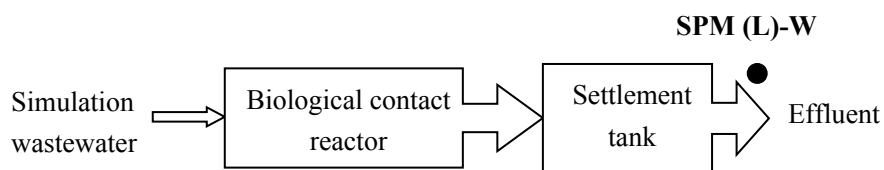

(c) Lab-scale SPM simulation wastewater treatment system

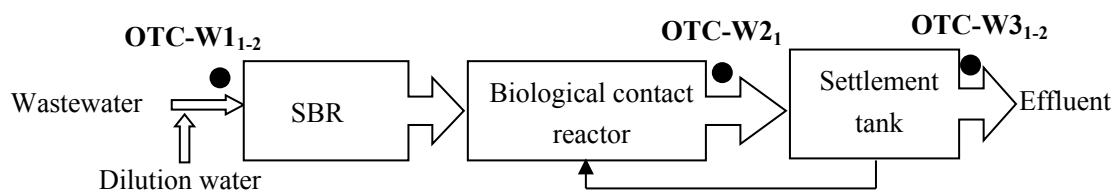

(d) Biological OTC production wastewater treatment system

**Fig.S1** The flow chart and sampling sites of four wastewater treatment systems treating Spiramycin (SPM) in Pilot-scale (a), Full-scale (b), Lab-scale (c), and Oxytetracycline (OTC) (d).

“ • ”: Sampling sites. **UASB**: Up-flow Anaerobic Sludge Bed; **SBR**: Sequential Batch Reactor.

**SPM (P)-W1, W2, W3**: UASB effluent, Anoxic reactor effluent, Aerobic reactor effluent from the pilot-scale system for treating SPM wastewater; **SPM (F)-W1, W2**: Anoxic reactor effluent, Final effluent from full-scale system for treating SPM wastewater; **SPM (L)-W**: Final effluent from lab-scale system for treating SPM simulation wastewater; **OTC-W1, W2, W3**: influent,

**Table S1** Composition of antibiotic assay medium No.3

| Substance            | g/L | Substance                      | g/L     |
|----------------------|-----|--------------------------------|---------|
| Peptone              | 5   | Sodium chloride                | 3.5     |
| Beef extract powder  | 1.5 | Dipotassium hydrogen phosphate | 3.68    |
| Yeast extract powder | 3   | Potassium dihydrogen phosphate | 1.32    |
| Glucose              | 1   | pH                             | 7.0-7.2 |

**Table S2** Preparation of phosphate buffer solution (PBS)

| PBS    | Dipotassium hydrogen phosphate | Potassium dihydrogen phosphate |
|--------|--------------------------------|--------------------------------|
| pH=7.8 | 5.59 g/L                       | 0.41 g/L                       |
| pH=6.0 | 2.00 g/L                       | 8.00 g/L                       |

**Table S3** ESI-MS/MS parameters for OTCs

| Analyte           | MRM transition (m/z)      | Cone voltage (V) | Collision energy (kV) |
|-------------------|---------------------------|------------------|-----------------------|
| OTC               | 461.5 > 443, 461.5 > 426* | 25               | 15                    |
| EOTC              | 461.5 > 443, 461.5 > 426* | 25               | 15                    |
| $\alpha$ -apo-OTC | 443 > 426*, 443 > 408     | 23               | 18                    |
| $\beta$ -apo-OTC  | 443 > 426*, 443 > 408     | 23               | 18                    |

\*Predominant ion defined as a base peak for quantification.

**Table S4** ESI-MS/MS parameters for spiramycin and neospiramycin

| Analyte | MRM transition (m/z)          | Cone voltage (V) | Collision energy (kV) |
|---------|-------------------------------|------------------|-----------------------|
| NeoSPM  | 699.0 > 174.0*; 699.0 > 159.9 | 18               | 15                    |
| SPM     | 843.6 > 174.0*; 843.6 > 100.9 | 25               | 25                    |

\*Predominant ion defined as a base peak for quantification.

**Table S5** Brief review about potency assay in this study and previous studies

| Target sample                   |                                                                         | Environmental process                                 | Tested method                       |                                           | Tested strain                                                          | Potency expression                                                     | Antibiotic analyses | Reference  |
|---------------------------------|-------------------------------------------------------------------------|-------------------------------------------------------|-------------------------------------|-------------------------------------------|------------------------------------------------------------------------|------------------------------------------------------------------------|---------------------|------------|
| Environmental samples           | Antibiotic production wastewater                                        | Wastewater treatment systems                          | Real-time quantitative assay method | 37 °C, agitation, real-time ( $\leq 4$ h) | <i>Staphylococcus aureus</i>                                           | Antibiotic equivalent quantity (EQ, mg/L)                              | UPLC-MS/MS          | This study |
| Artificial antibiotic solutions | Sulfa drug solution                                                     | Photolysis                                            | Fixed growth time method            | 37 °C, 200 rpm agitation, 8 h             | <i>Escherichia coli</i> DH5a                                           | EC <sub>50</sub>                                                       | HPLC                | 6          |
|                                 | Tetracycline solution                                                   | Photolysis                                            |                                     | 37 °C, 190 rpm agitation, 6 h             | <i>Escherichia coli</i> DH5a                                           | EC <sub>50</sub>                                                       | -                   | 7          |
|                                 | Lincomycin, ciprofloxacin, trimethoprim solutions                       | Oxidization by potassium permanganate                 |                                     | 37 °C, gently shaken, 6 h                 | <i>Escherichia coli</i> DH5R                                           | Growth inhibition (I, %); EC <sub>50</sub>                             | LC-MS/MS; HPLC-PDA  | 8          |
|                                 | Antibacterial molecules (13) <sup>a</sup> ; biocide triclosan solutions | O <sub>3</sub> , •OH treatment                        |                                     | 37 °C or 30 °C, 200 rpm agitation, 8 h    | <i>Escherichia coli</i> K12 wildtype; <i>Bacillus subtilis</i> Marburg | Growth inhibition (I, %); PEQ = EC <sub>50,0</sub> /EC <sub>50,x</sub> | -                   | 9          |
|                                 | Ciprofloxacin solution                                                  | Aqueous photolytic and photocatalytic batch reactions |                                     | 37 °C, 200 rpm agitation, 8 h             | <i>Escherichia coli</i>                                                | Growth inhibition (I, %); PEQ = EC <sub>50,0</sub> /EC <sub>50,x</sub> | HPLC                | 10         |

|                                            |                                |                               |                                  |                                                                        |                     |    |
|--------------------------------------------|--------------------------------|-------------------------------|----------------------------------|------------------------------------------------------------------------|---------------------|----|
| β-lactam, β-lactam-(R)-sulfoxide solutions | O <sub>3</sub> , •OH treatment | 30 °C, 200 rpm agitation, 8 h | <i>Bacillus subtilis</i> Marburg | Growth inhibition (I, %); PEQ = EC <sub>50,0</sub> /EC <sub>50,x</sub> | HPLC-MS/MS; HPLC-UV | 11 |
|--------------------------------------------|--------------------------------|-------------------------------|----------------------------------|------------------------------------------------------------------------|---------------------|----|

a. Roxithromycin, azithromycin, tylosin, ciprofloxacin, enrofloxacin, penicillinG, cephalixin, sulfamethoxazole, trimethoprim, lincomycin, tetracycline, vancomycin, amikacin.



**Table S6** Comparison of repeatability of the real-time quantitative method (n=5) with the conventional fixed growth time one

| Inhibition ratio <sup>a</sup> (%) | Conventional fixed growth time method |         |         |         |         | Real-time quantitative method (t <sub>x</sub> <sup>b</sup> ) |
|-----------------------------------|---------------------------------------|---------|---------|---------|---------|--------------------------------------------------------------|
|                                   | 100 min                               | 120 min | 140 min | 160 min | 180 min |                                                              |
| Oxytetracycline solution (n=5)    | 61.35                                 | 61.64   | 60.51   | 53.96   | 46.68   | 50.32 (170 min <sup>b</sup> )                                |
|                                   | 52.77                                 | 55.15   | 54.34   | 50.69   | 42.88   | 50.69 (160 min <sup>b</sup> )                                |
|                                   | 58.76                                 | 56.68   | 54.45   | 48.62   | 38.54   | 51.46 (150 min <sup>b</sup> )                                |
|                                   | 57.59                                 | 55.96   | 52.54   | 46.65   | 36.23   | 50.00 (150 min <sup>b</sup> )                                |
|                                   | 53.57                                 | 55.53   | 55.52   | 53.08   | 46.82   | 50.51 (170 min <sup>b</sup> )                                |
| Average                           | 56.81                                 | 56.99   | 55.47   | 50.60   | 42.23   | 50.60                                                        |
| RSD (%)                           | 6.33                                  | 4.66    | 5.43    | 6.01    | 11.29   | 1.08                                                         |

<sup>a</sup> Results were expressed by inhibition ratio (%) of bacterial growth.

<sup>b</sup> t<sub>x</sub> was determined on the basis of the correlation coefficient of linearity in the real-time quantitative method.

**Table S7** Recovery rate of the real-time quantitative potency assay (n=6)

| Sample                                                     | Spiked concentration (mg/L) | Average potency (EQ mg/L) | Recovery rate (%) | Average recovery rate (%) |
|------------------------------------------------------------|-----------------------------|---------------------------|-------------------|---------------------------|
| Oxytetracycline in deionized water                         | 50                          | 49.68                     | 99.36             | 100.04                    |
|                                                            | 10                          | 9.97                      | 99.75             |                           |
|                                                            | 2                           | 2.02                      | 101.01            |                           |
| Oxytetracycline in oxytetracycline wastewater <sup>+</sup> | 5                           | 4.97                      | 99.40             | 99.40                     |
| Spiramycin in deionized water                              | 100                         | 98.05                     | 98.05             | 99.18                     |
|                                                            | 10                          | 10.01                     | 100.11            |                           |
|                                                            | 2                           | 1.99                      | 99.37             |                           |

<sup>+</sup> Addition of 5 mg/L oxytetracycline standards to oxytetracycline wastewater.

**Table S8** Potencies and oxytetracycline and its transformation products concentrations of oxytetracycline production wastewater ( $R^2 = 0.999$ .  $P < 0.01$ )

| Sample                           | Potency <sup>a</sup><br>(oxytetracycline<br>EQ mg/L) | OTC Conc. <sup>b</sup><br>(mg/L) | EOTC<br>Conc. <sup>b</sup><br>(mg/L) | $\alpha$ -OTC<br>Conc. <sup>b</sup><br>(mg/L) | $\beta$ -OTC<br>Conc. <sup>b</sup><br>(mg/L) |
|----------------------------------|------------------------------------------------------|----------------------------------|--------------------------------------|-----------------------------------------------|----------------------------------------------|
| OTC-W1 <sub>1</sub>              | 8.43 $\pm$ 0.49                                      | 7.80 $\pm$ 0.67                  | 0.61 $\pm$ 0.04                      | -                                             | -                                            |
| OTC-W2 <sub>1</sub>              | 2.27 $\pm$ 0.14                                      | 2.24 $\pm$ 0.01                  | -                                    | -                                             | -                                            |
| OTC-W3 <sub>1</sub>              | 1.52 $\pm$ 0.16                                      | 2.03 $\pm$ 0.01                  | -                                    | -                                             | -                                            |
| OTC-W1 <sub>1</sub> <sup>+</sup> | 13.41 $\pm$ 0.76                                     | 12.23 $\pm$ 0.04                 | 0.75 $\pm$ 0.01                      | -                                             | -                                            |
| OTC-W1 <sub>2</sub>              | 6.57 $\pm$ 0.24                                      | 6.26 $\pm$ 0.16                  | 0.41 $\pm$ 0.03                      | -                                             | -                                            |
| OTC-W3 <sub>2</sub>              | 0.66 $\pm$ 0.04                                      | 0.62 $\pm$ 0.09                  | -                                    | -                                             | -                                            |

<sup>a</sup> Antibacterial potency determined by real-time quantitative method expressed by oxytetracycline equivalent quantity.

<sup>b</sup> Concentrations of oxytetracycline (OTC) and its transformation products (4-epioxytetracycline (EOTC),  $\alpha$ -apo-oxytetracycline ( $\alpha$ -OTC),  $\beta$ -apo-oxytetracycline ( $\beta$ -OTC)) determined by UPLC-MS/MS.

<sup>+</sup> Addition of 5 mg/L oxytetracycline standards.

**Table S9** Potencies and spiramycin concentrations of spiramycin production wastewater ( $R^2 = 0.896$ .  $P < 0.01$ )

| Sample                  | Potency <sup>a</sup> (spiramycin EQ mg/L) | SPM Conc. <sup>b</sup> (mg/L) |
|-------------------------|-------------------------------------------|-------------------------------|
| SPM (P)-W1 <sub>1</sub> | 11.01 $\pm$ 0.08                          | 1.88 $\pm$ 0.03               |
| SPM (P)-W2 <sub>1</sub> | 8.56 $\pm$ 0.000                          | 1.61 $\pm$ 0.01               |
| SPM (P)-W3 <sub>1</sub> | 1.81 $\pm$ 0.11                           | 0.84 $\pm$ 0.01               |
| SPM (P)-W2 <sub>2</sub> | 8.91 $\pm$ 0.04                           | 2.26 $\pm$ 0.04               |
| SPM (P)-W3 <sub>2</sub> | 1.54 $\pm$ 0.01                           | 0.77 $\pm$ 0.01               |
| SPM (P)-W2 <sub>3</sub> | 10.91 $\pm$ 0.83                          | 1.50 $\pm$ 0.07               |
| SPM (P)-W3 <sub>3</sub> | 1.81 $\pm$ 0.12                           | 0.81 $\pm$ 0.03               |
| SPM (F)-W1 <sub>1</sub> | 1.65 $\pm$ 0.22                           | 0.38 $\pm$ 0.01               |
| SPM (F)-W2 <sub>1</sub> | 0.71 $\pm$ 0.09                           | 0.31 $\pm$ 0.01               |
| SPM (F)-W1 <sub>2</sub> | 2.05 $\pm$ 0.04                           | 1.41 $\pm$ 0.05               |
| SPM (F)-W2 <sub>2</sub> | 1.50 $\pm$ 0.05                           | 0.39 $\pm$ 0.01               |

<sup>a</sup> Antibacterial potency determined by real-time quantitative method expressed by spiramycin equivalent quality.

<sup>b</sup> Spiramycin (SPM) concentration determined by UPLC-MS/MS.

## References:

1. W. Ben, Z. Qiang, C. Adams, H. Zhang and L. Chen, *Journal of Chromatography A*, 2008, **1202**, 173-180.
2. J. Wang and D. Leung, *Journal of Separation Science*, 2009, **32**, 681-688.
3. D. Li, M. Yang, J. Hu, L. Ren, Y. Zhang and K. Li, *Environmental Toxicology and Chemistry*, 2008, **27**, 80-86.
4. A. Gobel, C. S. McArdell, M. J. F. Suter and W. Giger, *Analytical Chemistry*, 2004, **76**, 4756-4764.
5. M. Liu, R. Ding, Y. Zhang, Y. Gao, Z. Tian, T. Zhang and M. Yang, *Water Research*, 2014, **63**, 33-41.
6. K. H. Wammer, T. M. Lapara, K. McNeill, W. A. Arnold and D. L. Swackhamer, *Environmental Toxicology and Chemistry*, 2006, **25**, 1480-1486.
7. K. H. Wammer, M. T. Slattery, A. M. Stemig and J. L. Ditty, *Chemosphere*, 2011, **85**, 1505-1510.
8. L. Hu, A. M. Stemig, K. H. Wammer and T. J. Strathmann, *Environmental Science & Technology*, 2011, **45**, 3635-3642.
9. M. C. Dodd, H. P. E. Kohler and U. Von Gunten, *Environmental Science & Technology*, 2009, **43**, 2498-2504.
10. T. Paul, M. C. Dodd and T. J. Strathmann, *Water research*, 2010, **44**, 3121-3132.
11. M. C. Dodd, D. Rentsch, H. P. Singer, H. P. E. Kohler and U. von Gunten, *Environmental Science & Technology*, 2010, **44**, 5940-5948.
